# Supplementary material for: Cognitive Job Demands and Sports Participation among Young Workers: What Moderates the Relationship?
Source: MDPI journal article supplement (doi:10.3390/ijerph21020144), 2024-01-28
Supplement: s1 [file s1]

## SUPPLEMENTAL MATERIALS

### A. Information operationalisations

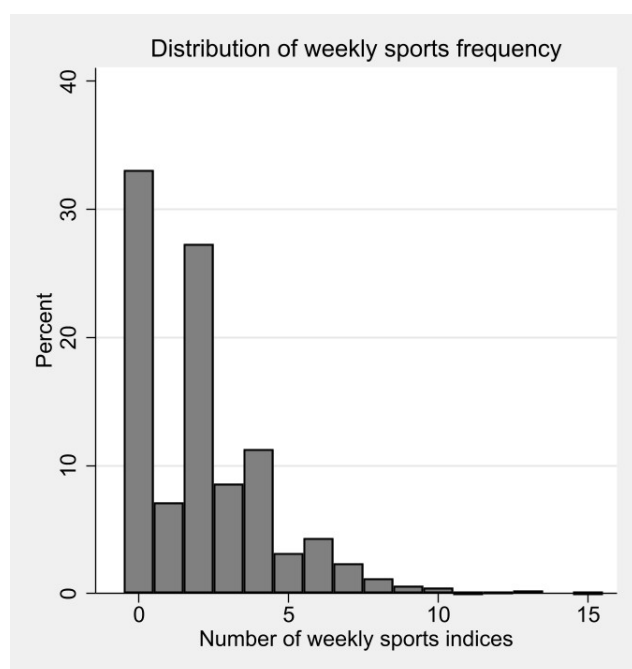

**Figure S1.** Histogram of weekly sports participation.

**Table S1.** Overview of educational levels and corresponding ISCED levels.

| Level                          | ISCED | Years of education |
|--------------------------------|-------|--------------------|
| (unfinished) Primary school    | 1     | 6                  |
| LBO/VBO/VMBOpraktijk/MBO1      | 2     | 8                  |
| MAVO/VMBO theorie              | 2     | 10.5               |
| MBO2/MBO3/MBO4                 | 3     | 10.5               |
| HAVO/VWO/HBS/propedeuse        | 3     | 11.5               |
| HBO or WO bachelor             | 5/6   | 15                 |
| HBO or WO master/postdoctoraal | 7     | 16.5               |

Note: see for overview

<https://eurydice.eacea.ec.europa.eu/national-education-systems/netherlands/overview>.

## B. Correlationmatrix

**Table S2.** Correlation matrix.

|                                                   | 1        | 2        | 3        | 4        | 5        | 6        | 7        | 8        | 9        | 10     | 11       |
|---------------------------------------------------|----------|----------|----------|----------|----------|----------|----------|----------|----------|--------|----------|
| Weekly sports participation - no indices          | -0.036   | -0.238 * | 0.096 *  | -0.156 * | -0.005   | 0.094 *  | 0.037    | 0.058 *  | -0.037   | 0.026  | 0.160 *  |
| Weekly sports participation - 1 to 3 indices      | -0.013   | 0.167 *  | 0.000    | 0.081 *  | -0.043   | -0.042   | 0.013    | 0.039    | -0.045 * | -0.022 | -0.089 * |
| Weekly sports participation – more than 3 indices | 0.055 *  | 0.085 *  | -0.110 * | 0.088 *  | 0.054 *  | -0.061 * | -0.057 * | -0.111 * | 0.092 *  | -0.004 | -0.083 * |
| 1 Cognitive job demands                           | 1.000    |          |          |          |          |          |          |          |          |        |          |
| 2 Years of education ( 6 years = 0)               | 0.137 *  | 1.000    |          |          |          |          |          |          |          |        |          |
| 3 Being a parent (= 1)                            | -0.051 * | -0.043   | 1.000    |          |          |          |          |          |          |        |          |
| 4 Control over work time and work location        | 0.006    | 0.383 *  | -0.013   | 1.000    |          |          |          |          |          |        |          |
| 5 Male (= 1)                                      | -0.072 * | -0.023   | -0.035   | 0.111 *  | 1.000    |          |          |          |          |        |          |
| 6 Age (18 years old = 0)                          | 0.017    | -0.019   | 0.394 *  | 0.045 *  | 0.075 *  | 1.000    |          |          |          |        |          |
| 7 Hampered by health (= 1)                        | 0.126 *  | -0.085 * | 0.000    | -0.043   | -0.069 * | -0.037   | 1.000    |          |          |        |          |
| 8 Cohabiting with a partner (= 1)                 | 0.023    | 0.023    | 0.446 *  | -0.006   | -0.075 * | 0.198 *  | 0.005    | 1.000    |          |        |          |
| 9 Working hours (20 hours = 0)                    | 0.210 *  | 0.093 *  | -0.206 * | 0.098 *  | 0.318 *  | 0.016    | -0.060 * | -0.092 * | 1.000    |        |          |
| 10 Permanent contract (= 1)                       | 0.072 *  | -0.066 * | 0.116 *  | -0.007   | 0.046 *  | 0.213 *  | -0.003   | 0.092 *  | 0.037    | 1.000  |          |
| 11Physical labour                                 | -0.028   | -0.430 * | 0.037    | -0.580 * | -0.074 * | -0.047 * | 0.055 *  | 0.009    | -0.064 * | 0.001  | 1.000    |

Source: Transition into active living, 2021, 2022; n = 2032. \* P < 0.05 ( two-tailed ).

### C. Tables additional analyses

**Table S3.** Outcomes from OLS regression estimating weekly sports frequency.

|                                          | Model1    |       | Model2   |       | Model3     |       | Model4    |       |
|------------------------------------------|-----------|-------|----------|-------|------------|-------|-----------|-------|
|                                          | b         | SE    | b        | SE    | b          | SE    | b         | SE    |
| Cognitive job demands                    | 0.103     | 0.092 | 0.292    | 0.327 | 0.282 **   | 0.106 | 0.079     | 0.153 |
| Years of education                       | 0.115 *** | 0.022 | 0.144 ** | 0.053 | 0.115 ***  | 0.022 | 0.115 *** | 0.022 |
| Parent (no = ref.)                       | -0.257 *  | 0.119 | -0.255 * | 0.119 | 0.669 *    | 0.295 | -0.258 *  | 0.119 |
| Control over work time and work location | 0.089 +   | 0.052 | 0.086    | 0.053 | 0.095      | 0.052 | 0.068     | 0.123 |
| Cognitive job demands*                   |           |       |          |       |            |       |           |       |
| Years of education                       |           |       | -0.022   | 0.037 |            |       |           |       |
| Parent (no = ref.)                       |           |       |          |       | -0.685 *** | 0.200 |           |       |
| Control over work time and work location |           |       |          |       |            |       | 0.016     | 0.083 |
| Intercept                                | 1.052 *** | 0.295 | 0.816 +  | 0.490 | 0.823 **   | 0.301 | 1.078 *** | 0.325 |

Source: Transition into active living, 2021, 2022; n = 2032. \* P < 0.05; \*\* P < 0.01, \*\*\* P < 0.001 (two-tailed)

Note: All models include the control variables from Table 2 Model 3.

**Table S4.** Outcomes from multinomial logistic regression estimating sports participation differentiated by sex with base outcome ‘no weekly sports indices’.

|                                              |  | Female(n=1267) |       |            |       |            |       | Male(n=765) |       |          |       |           |       |
|----------------------------------------------|--|----------------|-------|------------|-------|------------|-------|-------------|-------|----------|-------|-----------|-------|
|                                              |  | Model1         |       | Model2     |       | Model3     |       | Model1      |       | Model2   |       | Model3    |       |
|                                              |  | b              | SE    | b          | SE    | b          | SE    | b           | SE    | b        | SE    | b         | SE    |
| <b>One to three weekly sports indices</b>    |  |                |       |            |       |            |       |             |       |          |       |           |       |
| Cognitive job demands                        |  | -0.079         | 0.136 | 1.262 *    | 0.529 | -0.207     | 0.162 | -0.034      | 0.190 | 0.488    | 0.689 | 0.109     | 0.221 |
| Years of education                           |  | 0.132 ***      | 0.033 | 0.337 ***  | 0.085 | 0.129 ***  | 0.033 | 0.257 ***   | 0.046 | 0.335 ** | 0.112 | 0.255 *** | 0.046 |
| Parent (no = ref.)                           |  | -0.243         | 0.180 | -0.227     | 0.181 | -0.863 *   | 0.440 | -0.027      | 0.234 | -0.030   | 0.234 | 0.635     | 0.587 |
| Control over work time and work location     |  | 0.153 +        | 0.078 | 0.153 +    | 0.079 | 0.152 +    | 0.079 | 0.043       | 0.103 | 0.034    | 0.104 | 0.053     | 0.104 |
| Cognitive job demands*                       |  |                |       |            |       |            |       |             |       |          |       |           |       |
| Years of education                           |  |                |       | -0.154 **  | 0.058 |            |       |             |       | -0.060   | 0.078 |           |       |
| Parent (no = ref.)                           |  |                |       |            |       | 0.439      | 0.285 |             |       |          |       | -0.503    | 0.411 |
| Intercept                                    |  | -0.805 +       | 0.430 | -2.509 **  | 0.791 | -0.638     | 0.445 | -1.367 *    | 0.606 | -2.012 + | 1.027 | -1.540 *  | 0.621 |
| <b>More than three weekly sports indices</b> |  |                |       |            |       |            |       |             |       |          |       |           |       |
| Cognitive job demands                        |  | -0.029         | 0.163 | 0.973      | 0.642 | 0.028      | 0.185 | 0.367 +     | 0.199 | 0.352    | 0.696 | 0.586 **  | 0.225 |
| Years of education                           |  | 0.124 **       | 0.040 | 0.280 **   | 0.103 | 0.127 **   | 0.040 | 0.129 **    | 0.047 | 0.128    | 0.118 | 0.125 **  | 0.047 |
| Parent (no = ref.)                           |  | -0.492 *       | 0.223 | -0.477 *   | 0.224 | 0.007      | 0.548 | -0.157      | 0.270 | -0.156   | 0.270 | 1.196 +   | 0.680 |
| Control over work time and work location     |  | 0.189 *        | 0.093 | 0.190 *    | 0.093 | 0.187 *    | 0.093 | 0.130       | 0.113 | 0.129    | 0.114 | 0.149     | 0.114 |
| Cognitive job demands*                       |  |                |       |            |       |            |       |             |       |          |       |           |       |
| Years of education                           |  |                |       | -0.117 +   | 0.070 |            |       |             |       | 0.000    | 0.080 |           |       |
| Parent (no = ref.)                           |  |                |       |            |       | -0.366     | 0.372 |             |       |          |       | -1.017 *  | 0.477 |
| Intercept                                    |  | -1.799 ***     | 0.528 | -3.070 *** | 0.966 | -1.880 *** | 0.541 | -1.152 +    | 0.638 | -1.118   | 1.071 | -1.453 *  | 0.656 |

Source: Transition into active living, 2021, 2022; n = 2032. + P < 0.10; \* P < 0.05; \*\* P < 0.01; \*\*\* P < 0.001 (two-tailed)

Note: All models include the control variables from Table 2 Model 3.
